# Supplementary material for: Automatic Generation of Figural Analogies With the IMak Package
Source: Front Psychol. 2018 Aug 6;9:1286. doi: 10.3389/fpsyg.2018.01286 (PMC6087760; doi:10.3389/fpsyg.2018.01286)
Supplement: Supplementary file 1 [file Data_Sheet_1.ZIP]

Archive with 7 entries (7 files):
- Few examples of IMak items.pdf
- IMak template.R
- Q matrix of the IMak-generated items.pdf
- Scree Plot of the current data.pdf
- Unpurified data matrix with variable definitions.xlsx
- Table with IRA, IPCR and IMRT.csv
- IMak on the field.pdf
