# Supplementary material for: Automatic Generation of Figural Analogies With the IMak Package
Source: Front Psychol. 2018 Aug 6;9:1286. doi: 10.3389/fpsyg.2018.01286 (PMC6087760; doi:10.3389/fpsyg.2018.01286)
Supplement: Supplementary file 1 [file Data_Sheet_1.ZIP › Table with IRA, IPCR and IMRT.csv]

Items	IRA	IPCR	IMRT
1	1	0.680781759	44.86631596
2	2	0.530944625	71.27725081
3	3	0.446254072	89.51603909
4	4	0.42019544	95.07494463
5	1	0.846905537	35.38534853
6	2	0.534201954	75.89334853
7	3	0.573289902	78.0625798
8	4	0.296416938	118.5256254
9	1	0.762214984	47.9295342
10	2	0.482084691	75.92208795
11	3	0.534201954	78.53865798
12	4	0.433224756	96.5259316
13	1	0.442996743	72.9814886
14	2	0.534201954	88.59712052
15	3	0.371335505	88.20392834
16	4	0.469055375	93.15024756
17	1	0.899022801	30.21818567
18	2	0.247557003	77.78025733
19	3	0.583061889	67.76353746
20	4	0.397394137	110.1403257
21	2	0.671009772	56.63949511
22	3	0.175895765	106.5084235
23	4	0.51465798	87.0280684
