# Supplementary material for: Automatic Generation of Figural Analogies With the IMak Package
Source: Front Psychol. 2018 Aug 6;9:1286. doi: 10.3389/fpsyg.2018.01286 (PMC6087760; doi:10.3389/fpsyg.2018.01286)
Supplement: Supplementary file 1 [file Data_Sheet_1.ZIP › Unpurified data matrix with variable definitions.xlsx]

## Sheet: Unpurified data matrix
Participant	Age	Gender	Secondary	Country	Language	Total	Item1	Item2	Item3	Item4	Item5	Item6	Item7	Item8	Item9	Item10	Item11	Item12	Item13	Item14	Item15	Item16	Item17	Item18	Item19	Item20	Item21	Item22	Item23	Binary1	Binary2	Binary3	Binary4	Binary5	Binary6	Binary7	Binary8	Binary9	Binary10	Binary11	Binary12	Binary13	Binary14	Binary15	Binary16	Binary17	Binary18	Binary19	Binary20
1	25	1	1	51	2	13	5	9	9	9	2	2	3	5	5	3	7	6	9	3	8	9	7	7	8	6	3	4	4	1	0	0	0	1	0	0	0	1	1	1	1	1	1	0	0	1	0	1	1
2	25	2	1	51	2	5	1	9	9	10	2	2	10	2	5	10	10	10	2	2	1	1	7	5	10	9	3	5	10	0	0	0	0	1	0	0	0	1	0	0	0	0	0	1	0	1	0	0	0
3	29	2	1	51	2	10	5	7	9	1	2	4	8	9	9	6	7	9	1	6	9	2	7	4	4	1	4	5	6	1	1	0	1	1	1	1	1	0	0	1	0	0	0	0	1	1	0	0	0
4	25	1	3	51	2	22	5	7	4	1	2	4	8	9	5	3	7	6	9	3	1	2	7	9	8	6	3	5	4	1	1	1	1	1	1	1	1	1	1	1	1	1	1	1	1	1	1	1	1
5	29	1	2	51	2	11	5	3	3	4	2	4	3	9	5	3	7	7	3	3	6	8	7	2	4	1	3	6	4	1	0	0	0	1	1	0	1	1	1	1	0	0	1	0	0	1	0	0	0
6	31	2	6	51	2	21	5	7	4	1	2	4	8	9	5	3	7	6	9	3	1	2	7	9	9	6	3	5	4	1	1	1	1	1	1	1	1	1	1	1	1	1	1	1	1	1	1	0	1
7	25	1	1	51	2	22	5	7	4	1	2	4	8	9	5	3	7	6	9	3	1	2	7	9	8	6	3	7	4	1	1	1	1	1	1	1	1	1	1	1	1	1	1	1	1	1	1	1	1
8	37	2	1	51	2	6	1	1	6	8	2	5	6	3	5	3	6	8	4	3	8	7	7	5	8	1	7	2	6	0	0	0	0	1	0	0	0	1	1	0	0	0	1	0	0	1	0	1	0
9	22	2	1	51	2	16	5	7	4	10	2	4	8	9	5	6	7	6	3	9	1	2	7	9	9	9	3	5	4	1	1	1	0	1	1	1	1	1	0	1	1	0	0	1	1	1	1	0	0
10	28	2	3	51	2	19	5	7	4	1	2	4	8	2	5	9	7	6	9	3	1	2	7	7	8	6	3	5	4	1	1	1	1	1	1	1	0	1	0	1	1	1	1	1	1	1	0	1	1
11	41	1	1	51	2	10	5	7	7	2	2	9	8	9	5	4	9	6	5	7	3	2	7	4	8	1	5	8	1	1	1	0	0	1	0	1	1	1	0	0	1	0	0	0	1	1	0	1	0
12	26	2	5	51	2	14	5	6	4	1	2	9	3	9	5	3	3	6	3	9	1	2	7	9	4	6	4	1	4	1	0	1	1	1	0	0	1	1	1	0	1	0	0	1	1	1	1	0	1
13	48	2	1	51	2	2	5	6	8	2	10	10	10	10	7	6	10	10	10	10	6	8	7	6	5	4	10	10	10	1	0	0	0	0	0	0	0	0	0	0	0	0	0	0	0	1	0	0	0
14	18	2	1	51	2	11	4	7	4	6	2	4	6	4	5	3	4	5	2	3	3	2	7	4	8	9	3	8	2	0	1	1	0	1	1	0	0	1	1	0	0	0	1	0	1	1	0	1	0
15	25	2	6	51	2	10	5	7	4	10	2	4	10	4	5	4	3	2	3	3	1	10	7	4	5	10	3	5	10	1	1	1	0	1	1	0	0	1	0	0	0	0	1	1	0	1	0	0	0
16	24	2	4	69	1	8	5	7	4	9	2	4	9	9	3	3	1	2	3	4	9	9	7	3	5	9	5	5	2	1	1	1	0	1	1	0	1	0	1	0	0	0	0	0	0	1	0	0	0
17	26	1	1	51	2	15	5	7	4	9	2	4	8	9	5	4	7	6	3	3	5	2	7	3	5	3	3	7	4	1	1	1	0	1	1	1	1	1	0	1	1	0	1	0	1	1	0	0	0
18	21	1	1	51	2	12	5	6	4	10	2	5	8	1	5	3	2	10	9	3	8	2	7	4	5	6	3	7	8	1	0	1	0	1	0	1	0	1	1	0	0	1	1	0	1	1	0	0	1
19	23	2	1	51	2	10	1	6	8	7	2	4	8	2	5	7	7	6	1	4	8	6	7	7	8	6	3	8	6	0	0	0	0	1	1	1	0	1	0	1	1	0	0	0	0	1	0	1	1
20	24	2	4	69	1	12	1	7	6	5	2	4	8	8	5	7	7	6	3	3	9	6	7	3	7	6	3	5	4	0	1	0	0	1	1	1	0	1	0	1	1	0	1	0	0	1	0	0	1
21	22	2	1	51	2	16	5	6	4	1	2	4	8	2	7	3	7	6	9	7	9	2	7	7	8	1	3	9	4	1	0	1	1	1	1	1	0	0	1	1	1	1	0	0	1	1	0	1	0
22	22	2	1	51	2	17	6	7	4	1	2	4	7	8	5	3	7	6	9	3	8	9	7	9	8	6	3	5	4	0	1	1	1	1	1	0	0	1	1	1	1	1	1	0	0	1	1	1	1
23	28	1	3	109	1	20	5	7	4	1	2	4	8	9	5	7	7	6	9	3	1	2	7	7	8	9	3	9	4	1	1	1	1	1	1	1	1	1	0	1	1	1	1	1	1	1	0	1	0
24	20	2	1	51	2	6	6	5	3	6	2	4	4	8	5	3	6	6	5	6	5	6	7	7	5	1	4	5	5	0	0	0	0	1	1	0	0	1	1	0	1	0	0	0	0	1	0	0	0
25	20	2	4	51	2	2	5	6	4	3	7	5	4	3	6	7	5	1	8	5	6	4	5	4	2	4	5	4	7	1	0	1	0	0	0	0	0	0	0	0	0	0	0	0	0	0	0	0	0
26	23	2	4	23	2	12	1	6	1	8	9	5	3	9	5	9	10	9	9	3	1	2	7	7	8	6	3	9	4	0	0	0	0	0	0	0	1	1	0	0	0	1	1	1	1	1	0	1	1
27	22	2	1	51	2	13	10	10	10	10	2	9	8	8	5	3	7	10	9	3	1	2	7	7	8	8	3	5	4	0	0	0	0	1	0	1	0	1	1	1	0	1	1	1	1	1	0	1	0
28	28	2	3	51	2	3	10	10	10	10	5	1	10	10	10	10	10	10	10	10	10	10	7	4	5	4	3	5	4	0	0	0	0	0	0	0	0	0	0	0	0	0	0	0	0	1	0	0	0
29	22	1	3	51	2	16	5	6	4	9	2	4	8	2	5	7	7	6	3	6	1	2	7	9	8	6	3	1	4	1	0	1	0	1	1	1	0	1	0	1	1	0	0	1	1	1	1	1	1
30	27	2	1	51	2	16	5	7	4	1	5	4	8	2	5	3	7	7	9	3	1	7	7	4	8	8	3	5	4	1	1	1	1	0	1	1	0	1	1	1	0	1	1	1	0	1	0	1	0
31	19	1	1	51	2	18	5	7	4	4	2	4	8	8	5	3	7	6	9	3	1	2	7	3	8	8	3	4	4	1	1	1	0	1	1	1	0	1	1	1	1	1	1	1	1	1	0	1	0
32	25	2	2	51	2	9	4	7	4	8	2	5	8	2	5	5	5	4	9	7	8	10	7	7	4	4	3	8	4	0	1	1	0	1	0	1	0	1	0	0	0	1	0	0	0	1	0	0	0
33	0	2	1	51	2	18	5	7	3	9	2	4	8	9	5	3	9	6	9	5	1	2	7	9	8	9	3	9	4	1	1	0	0	1	1	1	1	1	1	0	1	1	0	1	1	1	1	1	0
34	22	2	1	51	2	11	5	7	3	5	2	2	3	9	5	3	10	6	3	3	9	10	7	4	8	1	3	5	3	1	1	0	0	1	0	0	1	1	1	0	1	0	1	0	0	1	0	1	0
35	22	2	1	51	2	11	3	7	4	7	2	4	3	7	5	3	7	8	3	5	1	6	7	7	8	5	3	5	9	0	1	1	0	1	1	0	0	1	1	1	0	0	0	1	0	1	0	1	0
36	27	1	2	51	2	10	5	7	2	1	10	10	10	10	5	9	3	10	3	3	1	2	7	7	8	6	10	10	10	1	1	0	1	0	0	0	0	1	0	0	0	0	1	1	1	1	0	1	1
37	21	2	6	51	2	11	1	6	9	8	2	3	8	9	2	1	4	6	9	9	8	2	9	9	8	1	3	9	4	0	0	0	0	1	0	1	1	0	0	0	1	1	0	0	1	0	1	1	0
38	23	2	1	51	2	19	5	7	4	1	2	4	8	8	5	3	7	6	3	3	1	2	7	6	8	6	3	5	4	1	1	1	1	1	1	1	0	1	1	1	1	0	1	1	1	1	0	1	1
39	24	2	1	51	2	14	5	7	4	1	2	7	6	2	5	3	3	6	3	3	1	8	7	7	8	3	3	5	4	1	1	1	1	1	0	0	0	1	1	0	1	0	1	1	0	1	0	1	0
40	23	2	1	51	2	18	5	7	4	1	2	4	3	9	5	3	7	6	3	3	1	2	7	7	8	9	3	5	4	1	1	1	1	1	1	0	1	1	1	1	1	0	1	1	1	1	0	1	0
41	38	2	1	51	2	3	7	6	5	8	1	7	8	7	3	6	6	4	7	7	9	6	7	7	5	5	3	3	3	0	0	0	0	0	0	1	0	0	0	0	0	0	0	0	0	1	0	0	0
42	42	2	2	7	3	14	5	7	4	9	2	9	8	9	6	6	3	6	9	7	8	2	7	7	8	6	3	5	4	1	1	1	0	1	0	1	1	0	0	0	1	1	0	0	1	1	0	1	1
43	33	2	1	51	2	23	5	7	4	1	2	4	8	9	5	3	7	6	9	3	1	2	7	9	8	6	3	9	4	1	1	1	1	1	1	1	1	1	1	1	1	1	1	1	1	1	1	1	1
44	33	2	2	51	2	10	1	7	4	1	2	4	8	9	5	3	1	9	10	10	10	10	10	10	10	10	3	10	10	0	1	1	1	1	1	1	1	1	1	0	0	0	0	0	0	0	0	0	0
45	17	2	1	51	2	16	5	7	9	1	2	4	8	2	5	4	7	6	9	3	8	2	7	7	5	1	3	9	4	1	1	0	1	1	1	1	0	1	0	1	1	1	1	0	1	1	0	0	0
46	31	1	3	51	2	17	5	6	4	1	2	4	8	7	5	4	7	6	2	3	5	2	7	9	8	6	3	5	4	1	0	1	1	1	1	1	0	1	0	1	1	0	1	0	1	1	1	1	1
47	33	2	1	51	2	13	5	7	7	2	2	8	3	9	1	3	3	6	9	3	5	2	7	7	8	6	4	5	4	1	1	0	0	1	0	0	1	0	1	0	1	1	1	0	1	1	0	1	1
48	41	2	5	51	2	6	10	10	10	10	2	4	8	8	10	10	10	10	9	7	2	10	10	10	10	10	3	5	4	0	0	0	0	1	1	1	0	0	0	0	0	1	0	0	0	0	0	0	0
49	32	2	4	51	2	21	5	7	4	1	2	4	8	9	5	3	7	6	9	3	8	2	7	9	8	6	3	5	4	1	1	1	1	1	1	1	1	1	1	1	1	1	1	0	1	1	1	1	1
50	38	1	1	7	3	19	5	7	4	1	2	4	8	9	5	3	7	6	9	3	4	2	7	9	8	6	10	10	10	1	1	1	1	1	1	1	1	1	1	1	1	1	1	0	1	1	1	1	1
51	33	2	1	51	2	13	5	7	4	1	2	2	8	4	5	7	1	5	3	7	3	1	7	9	8	6	3	4	4	1	1	1	1	1	0	1	0	1	0	0	0	0	0	0	0	1	1	1	1
52	32	1	3	51	2	13	5	3	3	8	2	4	8	8	7	9	7	6	9	3	9	8	7	9	8	6	3	5	9	1	0	0	0	1	1	1	0	0	0	1	1	1	1	0	0	1	1	1	1
53	34	2	1	51	2	16	5	7	2	9	2	4	8	9	5	3	9	6	9	3	1	7	7	9	8	8	10	5	4	1	1	0	0	1	1	1	1	1	1	0	1	1	1	1	0	1	1	1	0
54	26	2	3	51	2	17	5	7	4	1	2	3	8	9	5	3	4	6	9	5	9	2	7	4	8	6	3	5	4	1	1	1	1	1	0	1	1	1	1	0	1	1	0	0	1	1	0	1	1
55	51	2	3	51	2	5	1	7	10	2	2	7	3	10	5	7	7	10	5	7	9	10	7	4	4	10	5	8	6	0	1	0	0	1	0	0	0	1	0	1	0	0	0	0	0	1	0	0	0
56	37	1	2	51	2	9	1	6	4	1	2	9	8	3	3	6	3	7	5	7	8	2	7	9	5	9	3	9	8	0	0	1	1	1	0	1	0	0	0	0	0	0	0	0	1	1	1	0	0
57	33	1	1	51	2	7	1	6	3	7	2	4	8	8	9	4	7	1	1	7	8	2	7	4	7	1	3	4	7	0	0	0	0	1	1	1	0	0	0	1	0	0	0	0	1	1	0	0	0
58	40	1	1	51	2	9	5	10	2	2	2	9	3	10	5	4	7	1	9	6	10	4	7	4	8	10	3	5	4	1	0	0	0	1	0	0	0	1	0	1	0	1	0	0	0	1	0	1	0
59	22	2	6	51	2	16	5	7	4	9	2	4	8	8	5	3	7	2	3	3	4	2	7	4	8	6	3	5	4	1	1	1	0	1	1	1	0	1	1	1	0	0	1	0	1	1	0	1	1
60	34	2	2	51	2	9	1	4	4	1	2	4	3	7	5	6	8	1	1	4	9	2	7	7	8	9	3	1	8	0	0	1	1	1	1	0	0	1	0	0	0	0	0	0	1	1	0	1	0
61	20	1	5	51	2	3	4	4	9	5	8	9	4	8	7	3	9	8	7	8	7	4	7	6	8	9	7	3	8	0	0	0	0	0	0	0	0	0	1	0	0	0	0	0	0	1	0	1	0
62	31	2	2	51	2	12	5	2	4	1	2	4	8	6	5	4	4	1	3	7	9	2	7	1	4	6	3	5	4	1	0	1	1	1	1	1	0	1	0	0	0	0	0	0	1	1	0	0	1
63	27	1	3	51	2	8	5	8	4	8	8	2	8	2	1	8	7	4	6	8	1	3	7	4	8	1	8	2	4	1	0	1	0	0	0	1	0	0	0	1	0	0	0	1	0	1	0	1	0
64	21	1	1	51	2	20	5	7	4	1	2	4	8	9	7	3	7	1	9	3	1	2	7	9	8	6	3	5	4	1	1	1	1	1	1	1	1	0	1	1	0	1	1	1	1	1	1	1	1
65	38	1	2	51	2	17	5	7	2	9	2	4	8	9	5	3	7	6	9	3	1	9	7	3	5	6	3	8	4	1	1	0	0	1	1	1	1	1	1	1	1	1	1	1	0	1	0	0	1
66	19	2	2	51	2	12	5	8	4	7	2	4	8	1	7	3	7	5	1	7	9	2	7	9	8	9	3	5	3	1	0	1	0	1	1	1	0	0	1	1	0	0	0	0	1	1	1	1	0
67	21	2	3	51	2	18	5	7	4	1	2	4	8	8	5	3	7	6	3	3	1	2	7	7	8	6	9	5	4	1	1	1	1	1	1	1	0	1	1	1	1	0	1	1	1	1	0	1	1
68	26	2	2	94	2	12	5	3	4	1	2	4	8	2	5	7	7	1	3	7	1	1	7	6	5	6	3	4	9	1	0	1	1	1	1	1	0	1	0	1	0	0	0	1	0	1	0	0	1
69	21	1	3	51	2	20	5	7	4	1	2	7	3	9	5	3	7	6	9	3	1	2	7	9	8	6	3	5	4	1	1	1	1	1	0	0	1	1	1	1	1	1	1	1	1	1	1	1	1
70	34	1	3	94	2	6	1	4	4	8	2	8	6	2	7	9	4	4	9	7	4	7	7	7	4	6	3	4	1	0	0	1	0	1	0	0	0	0	0	0	0	1	0	0	0	1	0	0	1
71	29	2	2	33	1	7	5	6	6	8	2	6	6	4	7	6	4	6	7	3	8	7	7	7	7	6	3	4	6	1	0	0	0	1	0	0	0	0	0	0	1	0	1	0	0	1	0	0	1
72	38	1	1	51	2	16	5	7	6	1	2	4	6	1	5	6	3	8	9	3	1	2	7	3	8	6	3	9	4	1	1	0	1	1	1	0	0	1	0	0	0	1	1	1	1	1	0	1	1
73	22	2	2	55	3	2	6	7	6	2	6	8	5	8	3	7	8	7	3	8	8	8	8	1	1	4	3	1	7	0	1	0	0	0	0	0	0	0	0	0	0	0	0	0	0	0	0	0	0
74	37	2	1	51	2	15	5	6	4	1	2	4	6	4	5	3	4	9	9	3	9	2	7	9	8	9	3	5	4	1	0	1	1	1	1	0	0	1	1	0	0	1	1	0	1	1	1	1	0
75	49	2	2	51	2	3	5	10	10	10	10	10	10	10	5	5	10	8	10	10	10	10	10	10	10	10	3	1	3	1	0	0	0	0	0	0	0	1	0	0	0	0	0	0	0	0	0	0	0
76	29	1	1	98	1	20	5	7	4	1	2	4	8	8	5	3	7	9	9	3	1	2	7	9	8	6	3	5	4	1	1	1	1	1	1	1	0	1	1	1	0	1	1	1	1	1	1	1	1
77	24	2	4	51	2	1	3	10	8	10	5	6	7	10	7	10	10	2	8	3	7	7	10	10	2	10	10	10	2	0	0	0	0	0	0	0	0	0	0	0	0	0	1	0	0	0	0	0	0
78	32	2	1	51	2	18	5	7	4	1	2	4	8	9	5	3	7	6	3	3	9	2	7	7	8	1	3	5	4	1	1	1	1	1	1	1	1	1	1	1	1	0	1	0	1	1	0	1	0
79	15	1	6	203	1	9	1	9	10	10	2	6	3	2	5	6	10	10	9	3	9	6	7	9	8	6	3	5	10	0	0	0	0	1	0	0	0	1	0	0	0	1	1	0	0	1	1	1	1
80	19	1	5	11	2	19	5	7	4	9	2	8	8	9	5	3	7	6	9	3	1	2	7	9	8	9	3	5	4	1	1	1	0	1	0	1	1	1	1	1	1	1	1	1	1	1	1	1	0
81	60	2	1	51	2	17	5	7	4	1	2	4	8	9	5	6	7	6	3	3	1	3	7	4	8	9	3	1	4	1	1	1	1	1	1	1	1	1	0	1	1	0	1	1	0	1	0	1	0
82	62	2	1	7	3	6	4	6	4	2	1	4	8	8	6	5	3	9	8	3	3	9	7	5	9	5	3	5	2	0	0	1	0	0	1	1	0	0	0	0	0	0	1	0	0	1	0	0	0
83	50	2	1	51	2	2	5	10	10	10	5	9	9	10	2	4	10	10	7	10	3	1	7	4	10	10	4	3	10	1	0	0	0	0	0	0	0	0	0	0	0	0	0	0	0	1	0	0	0
84	23	2	1	51	2	9	10	10	10	9	2	2	8	5	3	3	10	5	3	9	9	10	7	9	8	6	3	5	4	0	0	0	0	1	0	1	0	0	1	0	0	0	0	0	0	1	1	1	1
85	45	1	3	51	2	22	5	7	4	1	2	4	8	9	5	3	7	6	3	3	1	2	7	9	8	6	3	9	4	1	1	1	1	1	1	1	1	1	1	1	1	0	1	1	1	1	1	1	1
86	38	2	1	51	2	16	5	7	4	2	2	8	6	10	5	3	7	6	9	3	9	8	7	9	8	1	3	9	4	1	1	1	0	1	0	0	0	1	1	1	1	1	1	0	0	1	1	1	0
87	28	2	1	51	2	19	5	7	4	1	2	4	8	8	5	3	7	6	9	3	1	2	7	4	5	6	5	9	4	1	1	1	1	1	1	1	0	1	1	1	1	1	1	1	1	1	0	0	1
88	52	2	1	51	2	14	5	6	4	1	2	4	8	9	5	4	7	1	9	3	9	2	7	7	9	1	3	4	3	1	0	1	1	1	1	1	1	1	0	1	0	1	1	0	1	1	0	0	0
89	19	2	1	51	2	20	5	7	4	1	2	4	8	8	5	3	7	6	3	3	1	2	7	9	8	9	3	9	4	1	1	1	1	1	1	1	0	1	1	1	1	0	1	1	1	1	1	1	0
90	19	2	1	51	2	13	1	7	6	7	2	4	8	8	5	3	4	1	9	7	1	2	7	4	8	6	3	5	10	0	1	0	0	1	1	1	0	1	1	0	0	1	0	1	1	1	0	1	1
91	31	1	1	51	2	12	5	6	6	2	2	4	8	8	5	8	7	8	3	3	1	2	7	4	8	8	5	4	4	1	0	0	0	1	1	1	0	1	0	1	0	0	1	1	1	1	0	1	0
92	43	1	3	51	2	21	5	7	3	1	2	4	8	9	5	3	7	6	9	3	1	2	7	7	8	6	3	9	4	1	1	0	1	1	1	1	1	1	1	1	1	1	1	1	1	1	0	1	1
93	38	2	1	51	2	15	5	6	4	2	2	7	8	9	5	3	3	7	9	3	1	2	7	7	8	9	3	5	4	1	0	1	0	1	0	1	1	1	1	0	0	1	1	1	1	1	0	1	0
94	20	2	1	51	2	10	5	4	4	8	2	4	3	9	5	3	3	1	3	7	5	8	7	6	9	1	3	5	4	1	0	1	0	1	1	0	1	1	1	0	0	0	0	0	0	1	0	0	0
95	39	2	4	82	2	16	5	8	4	1	2	1	8	4	5	3	1	6	9	3	1	2	7	7	8	6	3	5	1	1	0	1	1	1	0	1	0	1	1	0	1	1	1	1	1	1	0	1	1
96	21	2	1	51	2	12	5	6	4	2	2	9	8	3	7	8	7	6	9	3	9	7	7	4	8	6	5	4	4	1	0	1	0	1	0	1	0	0	0	1	1	1	1	0	0	1	0	1	1
97	20	2	1	51	2	15	5	7	4	1	2	8	8	8	5	4	7	6	9	7	5	2	7	4	8	1	3	5	4	1	1	1	1	1	0	1	0	1	0	1	1	1	0	0	1	1	0	1	0
98	20	2	1	51	2	13	5	7	4	2	2	4	3	8	5	3	4	2	3	3	1	2	7	4	8	1	3	10	6	1	1	1	0	1	1	0	0	1	1	0	0	0	1	1	1	1	0	1	0
99	25	2	6	51	2	8	1	3	10	1	2	4	8	10	5	7	6	10	9	7	5	7	7	4	8	1	4	10	9	0	0	0	1	1	1	1	0	1	0	0	0	1	0	0	0	1	0	1	0
100	26	2	1	51	2	6	5	10	4	1	2	9	9	10	9	4	9	7	7	9	4	2	7	7	4	9	5	2	9	1	0	1	1	1	0	0	0	0	0	0	0	0	0	0	1	1	0	0	0
101	19	2	1	51	2	8	1	6	9	2	2	4	8	2	7	4	9	5	3	3	8	9	7	7	5	9	3	9	4	0	0	0	0	1	1	1	0	0	0	0	0	0	1	0	0	1	0	0	0
102	20	2	1	51	2	10	5	2	9	1	2	4	6	7	5	1	7	7	1	9	5	8	7	10	8	4	3	9	3	1	0	0	1	1	1	0	0	1	0	1	0	0	0	0	0	1	0	1	0
103	24	2	1	51	2	17	5	7	4	1	2	4	8	9	5	6	7	1	9	3	5	2	7	7	8	1	3	5	4	1	1	1	1	1	1	1	1	1	0	1	0	1	1	0	1	1	0	1	0
104	18	2	1	51	2	21	5	7	4	1	2	4	8	8	5	3	7	6	9	3	1	2	7	9	8	6	3	5	4	1	1	1	1	1	1	1	0	1	1	1	1	1	1	1	1	1	1	1	1
105	20	2	3	51	2	4	1	6	10	8	3	4	10	6	10	10	3	1	9	6	3	10	7	3	5	7	3	4	3	0	0	0	0	0	1	0	0	0	0	0	0	1	0	0	0	1	0	0	0
106	19	2	1	197	2	11	5	3	9	5	2	2	10	9	5	3	7	5	9	5	9	2	7	10	8	1	9	9	10	1	0	0	0	1	0	0	1	1	1	1	0	1	0	0	1	1	0	1	0
107	19	2	1	51	2	11	5	7	5	2	2	4	6	3	5	2	7	8	9	7	9	7	7	7	8	2	3	8	4	1	1	0	0	1	1	0	0	1	0	1	0	1	0	0	0	1	0	1	0
108	22	2	1	51	2	12	1	5	9	2	2	4	8	1	5	6	7	6	9	7	9	1	7	9	8	10	3	5	4	0	0	0	0	1	1	1	0	1	0	1	1	1	0	0	0	1	1	1	0
109	18	2	1	51	2	11	5	7	6	8	2	4	8	4	5	5	2	2	3	3	8	8	7	7	8	2	3	4	4	1	1	0	0	1	1	1	0	1	0	0	0	0	1	0	0	1	0	1	0
110	23	2	6	51	2	8	6	6	1	1	2	9	8	3	7	1	7	10	9	7	10	8	7	7	8	1	4	5	4	0	0	0	1	1	0	1	0	0	0	1	0	1	0	0	0	1	0	1	0
111	18	2	1	51	2	12	3	9	4	5	2	4	8	3	5	4	7	7	9	3	9	10	7	7	8	3	3	10	4	0	0	1	0	1	1	1	0	1	0	1	0	1	1	0	0	1	0	1	0
112	26	2	1	51	2	11	5	5	5	10	2	4	6	2	5	3	4	6	3	3	8	2	7	4	8	1	3	4	9	1	0	0	0	1	1	0	0	1	1	0	1	0	1	0	1	1	0	1	0
113	18	2	1	51	2	5	7	10	9	10	10	4	10	8	10	10	10	10	9	7	5	10	7	9	8	8	10	10	10	0	0	0	0	0	1	0	0	0	0	0	0	1	0	0	0	1	1	1	0
114	39	1	1	169	1	8	5	7	2	4	2	4	3	4	5	9	9	2	9	7	1	8	7	4	5	1	4	4	9	1	1	0	0	1	1	0	0	1	0	0	0	1	0	1	0	1	0	0	0
115	19	2	4	51	2	20	5	7	4	1	2	4	8	9	5	3	7	6	3	3	1	2	7	9	8	6	3	5	6	1	1	1	1	1	1	1	1	1	1	1	1	0	1	1	1	1	1	1	1
116	19	2	1	51	2	12	5	10	2	4	2	2	8	8	5	3	7	6	5	3	1	9	7	4	8	4	3	4	9	1	0	0	0	1	0	1	0	1	1	1	1	0	1	1	0	1	0	1	0
117	26	1	3	51	2	13	5	7	4	1	2	9	8	9	5	4	1	6	5	3	9	6	9	9	8	8	9	5	4	1	1	1	1	1	0	1	1	1	0	0	1	0	1	0	0	0	1	1	0
118	27	1	3	51	2	22	5	7	4	9	2	4	8	9	5	3	7	6	9	3	1	2	7	9	8	6	3	9	4	1	1	1	0	1	1	1	1	1	1	1	1	1	1	1	1	1	1	1	1
119	21	2	1	51	2	11	5	4	10	2	2	4	8	9	5	6	3	9	10	3	9	2	7	6	7	9	3	9	1	1	0	0	0	1	1	1	1	1	0	0	0	0	1	0	1	1	0	0	0
120	19	1	1	51	2	20	5	6	6	1	2	4	8	9	5	3	7	6	9	3	1	2	7	9	8	6	3	5	4	1	0	0	1	1	1	1	1	1	1	1	1	1	1	1	1	1	1	1	1
121	25	2	6	10	2	7	1	3	4	2	7	4	3	6	5	6	7	7	1	3	5	2	7	7	4	4	5	4	1	0	0	1	0	0	1	0	0	1	0	1	0	0	1	0	1	1	0	0	0
122	20	2	1	51	2	17	1	6	4	1	2	4	8	9	5	7	4	6	9	3	1	2	7	9	8	6	3	5	6	0	0	1	1	1	1	1	1	1	0	0	1	1	1	1	1	1	1	1	1
123	18	2	3	51	2	21	5	7	6	1	2	4	8	9	5	3	7	6	9	3	1	2	7	9	8	6	9	9	4	1	1	0	1	1	1	1	1	1	1	1	1	1	1	1	1	1	1	1	1
124	22	2	6	197	2	15	5	7	3	2	2	7	8	8	5	3	7	6	9	5	9	2	7	4	8	6	3	5	4	1	1	0	0	1	0	1	0	1	1	1	1	1	0	0	1	1	0	1	1
125	19	1	1	51	2	5	1	2	8	5	2	3	8	9	3	9	3	1	1	7	3	2	9	4	8	8	9	7	6	0	0	0	0	1	0	1	1	0	0	0	0	0	0	0	1	0	0	1	0
126	17	2	1	201	2	12	5	7	9	10	2	10	4	10	5	3	7	10	9	3	1	2	7	7	5	10	3	5	10	1	1	0	0	1	0	0	0	1	1	1	0	1	1	1	1	1	0	0	0
127	19	1	1	51	2	11	5	7	4	2	2	8	8	9	5	3	9	5	3	9	9	1	7	7	8	9	3	10	9	1	1	1	0	1	0	1	1	1	1	0	0	0	0	0	0	1	0	1	0
128	22	2	1	51	2	6	1	5	10	10	2	4	10	10	5	3	9	7	5	10	8	10	7	3	10	10	3	10	10	0	0	0	0	1	1	0	0	1	1	0	0	0	0	0	0	1	0	0	0
129	22	2	1	51	2	14	5	7	4	8	2	8	3	7	5	3	7	6	5	3	1	2	7	4	8	8	3	1	7	1	1	1	0	1	0	0	0	1	1	1	1	0	1	1	1	1	0	1	0
130	31	2	2	51	2	10	7	7	3	1	2	6	3	7	5	3	4	6	3	3	9	4	7	7	8	9	3	5	7	0	1	0	1	1	0	0	0	1	1	0	1	0	1	0	0	1	0	1	0
131	32	1	3	51	2	17	5	7	4	1	2	4	8	9	5	4	7	6	9	7	9	2	7	4	8	6	3	5	3	1	1	1	1	1	1	1	1	1	0	1	1	1	0	0	1	1	0	1	1
132	18	2	1	51	2	14	5	7	4	8	2	4	8	7	5	3	7	6	1	3	9	10	7	1	8	9	3	5	9	1	1	1	0	1	1	1	0	1	1	1	1	0	1	0	0	1	0	1	0
133	42	1	1	51	2	10	5	7	9	9	2	9	9	9	5	9	7	9	9	7	1	9	9	9	9	9	3	5	9	1	1	0	0	1	0	0	1	1	0	1	0	1	0	1	0	0	1	0	0
134	19	2	1	51	2	11	5	7	8	5	2	9	6	5	5	9	7	5	9	7	9	2	7	7	8	6	3	5	9	1	1	0	0	1	0	0	0	1	0	1	0	1	0	0	1	1	0	1	1
135	53	1	4	33	1	15	5	7	6	1	2	4	8	5	5	7	7	6	9	7	1	6	7	7	8	6	3	5	7	1	1	0	1	1	1	1	0	1	0	1	1	1	0	1	0	1	0	1	1
136	19	2	1	51	2	4	5	9	9	5	2	6	3	10	2	4	4	6	1	6	3	3	7	2	6	4	5	10	6	1	0	0	0	1	0	0	0	0	0	0	1	0	0	0	0	1	0	0	0
137	30	1	5	203	1	4	5	7	6	5	1	9	2	10	3	7	1	1	1	6	9	10	7	1	8	1	5	1	1	1	1	0	0	0	0	0	0	0	0	0	0	0	0	0	0	1	0	1	0
138	23	2	1	51	2	21	5	8	4	1	2	4	8	9	5	3	7	6	9	3	1	2	7	9	8	6	3	7	4	1	0	1	1	1	1	1	1	1	1	1	1	1	1	1	1	1	1	1	1
139	30	2	2	51	2	22	5	7	4	1	2	4	8	9	5	3	7	6	9	3	1	2	7	9	9	6	3	9	4	1	1	1	1	1	1	1	1	1	1	1	1	1	1	1	1	1	1	0	1
140	46	1	3	51	2	19	3	7	3	1	2	4	8	9	5	6	7	6	9	3	1	2	7	7	8	6	3	9	4	0	1	0	1	1	1	1	1	1	0	1	1	1	1	1	1	1	0	1	1
141	35	2	1	51	2	3	5	6	5	6	4	3	5	5	7	2	1	3	3	7	3	4	5	5	2	6	3	8	2	1	0	0	0	0	0	0	0	0	0	0	0	0	0	0	0	0	0	0	1
142	33	2	1	51	2	8	1	7	6	10	10	10	10	10	5	3	7	10	9	7	4	8	7	4	8	6	10	10	10	0	1	0	0	0	0	0	0	1	1	1	0	1	0	0	0	1	0	1	1
143	45	1	2	197	1	11	5	7	6	2	2	4	8	7	5	4	4	8	5	3	5	2	7	4	4	6	3	5	7	1	1	0	0	1	1	1	0	1	0	0	0	0	1	0	1	1	0	0	1
144	45	1	1	4	1	11	5	2	8	2	2	4	3	3	5	3	7	8	5	3	5	8	7	4	8	8	3	5	4	1	0	0	0	1	1	0	0	1	1	1	0	0	1	0	0	1	0	1	0
145	40	1	5	18	1	14	5	7	4	1	2	4	8	1	5	1	7	6	3	3	3	1	7	7	8	1	3	8	1	1	1	1	1	1	1	1	0	1	0	1	1	0	1	0	0	1	0	1	0
146	52	1	1	150	1	9	5	7	4	4	2	4	6	7	5	3	5	6	5	7	5	7	7	4	4	5	5	5	6	1	1	1	0	1	1	0	0	1	1	0	1	0	0	0	0	1	0	0	0
147	19	1	3	207	1	18	5	7	6	1	2	8	8	9	5	3	7	6	9	3	1	2	7	4	9	6	3	5	4	1	1	0	1	1	0	1	1	1	1	1	1	1	1	1	1	1	0	0	1
148	28	1	2	51	2	21	5	7	4	1	2	4	8	8	5	3	7	6	9	3	1	2	7	9	8	6	3	10	4	1	1	1	1	1	1	1	0	1	1	1	1	1	1	1	1	1	1	1	1
149	39	1	6	169	1	14	5	7	4	1	2	2	6	2	5	4	9	9	9	7	1	2	7	7	8	6	8	9	4	1	1	1	1	1	0	0	0	1	0	0	0	1	0	1	1	1	0	1	1
150	22	1	2	178	1	5	1	9	9	9	2	9	9	2	5	6	9	9	9	9	9	9	7	4	9	9	9	9	9	0	0	0	0	1	0	0	0	1	0	0	0	1	0	0	0	1	0	0	0
151	42	1	4	151	1	15	5	7	4	5	2	4	8	8	5	3	7	8	9	3	5	7	7	4	8	6	3	5	6	1	1	1	0	1	1	1	0	1	1	1	0	1	1	0	0	1	0	1	1
152	54	1	1	45	2	16	5	7	9	1	2	4	9	9	5	9	7	6	9	3	4	2	7	4	5	9	3	9	4	1	1	0	1	1	1	0	1	1	0	1	1	1	1	0	1	1	0	0	0
153	36	2	1	51	2	3	10	10	10	10	2	9	10	10	10	10	10	10	9	9	4	10	7	7	5	1	10	10	10	0	0	0	0	1	0	0	0	0	0	0	0	1	0	0	0	1	0	0	0
154	30	1	1	5	1	2	5	5	5	5	4	6	5	5	5	5	5	5	5	5	5	5	5	4	5	5	5	5	5	1	0	0	0	0	0	0	0	1	0	0	0	0	0	0	0	0	0	0	0
155	31	2	1	51	2	9	5	7	9	9	2	8	3	4	5	2	3	6	9	7	9	9	7	4	8	9	4	5	4	1	1	0	0	1	0	0	0	1	0	0	1	1	0	0	0	1	0	1	0
156	29	2	3	174	1	15	5	7	4	9	2	4	8	2	5	3	10	10	9	7	1	2	7	7	8	6	5	5	4	1	1	1	0	1	1	1	0	1	1	0	0	1	0	1	1	1	0	1	1
157	16	1	1	174	1	11	5	9	4	9	2	5	8	9	9	4	7	6	9	3	5	8	7	7	7	5	9	9	7	1	0	1	0	1	0	1	1	0	0	1	1	1	1	0	0	1	0	0	0
158	54	1	1	45	2	23	5	7	4	1	2	4	8	9	5	3	7	6	9	3	1	2	7	9	8	6	3	9	4	1	1	1	1	1	1	1	1	1	1	1	1	1	1	1	1	1	1	1	1
159	30	1	3	203	1	19	5	7	4	9	2	4	8	9	7	4	7	6	9	3	1	2	7	9	8	9	3	9	4	1	1	1	0	1	1	1	1	0	0	1	1	1	1	1	1	1	1	1	0
160	22	1	1	51	2	20	5	7	4	9	2	4	8	9	5	3	3	6	9	3	1	2	7	9	8	6	3	1	4	1	1	1	0	1	1	1	1	1	1	0	1	1	1	1	1	1	1	1	1
161	39	1	1	7	3	5	5	5	3	4	2	7	4	6	6	3	1	7	7	5	6	9	7	4	9	6	4	2	3	1	0	0	0	1	0	0	0	0	1	0	0	0	0	0	0	1	0	0	1
162	35	1	6	7	3	10	3	7	4	9	2	2	4	5	5	3	10	9	9	10	9	10	7	9	8	8	4	9	1	0	1	1	0	1	0	0	0	1	1	0	0	1	0	0	0	1	1	1	0
163	31	2	3	7	3	4	10	6	6	10	6	7	8	6	5	6	7	5	7	2	1	10	2	7	4	1	5	2	10	0	0	0	0	0	0	1	0	1	0	1	0	0	0	1	0	0	0	0	0
164	45	2	6	7	3	3	7	6	10	7	8	8	6	1	5	6	1	10	7	3	8	5	5	3	10	5	5	10	4	0	0	0	0	0	0	0	0	1	0	0	0	0	1	0	0	0	0	0	0
165	46	2	2	123	3	5	5	1	8	1	2	4	8	4	3	7	5	7	7	1	8	6	8	1	4	2	5	8	1	1	0	0	1	1	1	1	0	0	0	0	0	0	0	0	0	0	0	0	0
166	45	1	2	3	1	6	5	2	4	2	2	4	3	7	5	6	3	7	5	7	5	7	7	4	4	5	4	1	8	1	0	1	0	1	1	0	0	1	0	0	0	0	0	0	0	1	0	0	0
167	48	2	1	7	3	7	5	6	10	8	2	4	3	3	3	1	7	5	3	2	5	7	7	7	8	9	3	1	6	1	0	0	0	1	1	0	0	0	0	1	0	0	0	0	0	1	0	1	0
168	66	1	1	7	3	6	5	6	6	6	4	4	8	4	5	2	1	5	9	4	6	6	7	2	7	10	7	7	8	1	0	0	0	0	1	1	0	1	0	0	0	1	0	0	0	1	0	0	0
169	59	2	4	7	3	3	3	6	4	6	6	6	3	8	7	6	4	6	7	7	4	7	7	7	3	4	5	6	6	0	0	1	0	0	0	0	0	0	0	0	1	0	0	0	0	1	0	0	0
170	29	1	6	51	2	6	7	10	3	7	2	7	3	2	5	3	7	1	3	7	4	10	7	4	7	1	3	1	10	0	0	0	0	1	0	0	0	1	1	1	0	0	0	0	0	1	0	0	0
171	43	1	3	38	3	21	5	7	4	1	2	8	8	9	5	3	7	6	3	3	1	2	7	9	8	6	3	9	4	1	1	1	1	1	0	1	1	1	1	1	1	0	1	1	1	1	1	1	1
172	25	2	3	175	1	8	5	7	4	5	10	10	10	10	5	10	10	10	3	3	5	2	10	10	10	10	3	5	4	1	1	1	0	0	0	0	0	1	0	0	0	0	1	0	1	0	0	0	0
173	50	1	3	84	1	5	5	3	2	3	2	4	1	6	5	2	8	8	5	6	4	7	4	8	4	3	4	5	4	1	0	0	0	1	1	0	0	1	0	0	0	0	0	0	0	0	0	0	0
174	53	2	1	162	2	3	1	4	10	2	6	7	3	9	3	8	6	7	3	7	5	10	7	4	9	2	8	8	4	0	0	0	0	0	0	0	1	0	0	0	0	0	0	0	0	1	0	0	0
175	39	2	4	10	1	6	3	7	9	1	2	5	7	2	5	9	1	4	7	4	9	3	7	3	7	8	4	7	4	0	1	0	1	1	0	0	0	1	0	0	0	0	0	0	0	1	0	0	0
176	30	2	3	51	2	14	6	7	4	9	2	9	8	2	5	3	3	1	9	3	1	7	7	7	8	6	3	5	4	0	1	1	0	1	0	1	0	1	1	0	0	1	1	1	0	1	0	1	1
177	24	2	5	203	1	22	5	7	4	1	2	4	8	5	5	3	7	6	9	3	1	2	7	9	8	6	3	9	4	1	1	1	1	1	1	1	0	1	1	1	1	1	1	1	1	1	1	1	1
178	26	1	6	197	1	20	5	7	4	1	2	4	8	2	5	3	7	6	9	5	8	2	7	9	8	6	3	9	4	1	1	1	1	1	1	1	0	1	1	1	1	1	0	0	1	1	1	1	1
179	28	2	6	11	2	12	5	8	4	1	2	4	6	4	5	7	7	4	9	3	9	2	7	10	5	3	3	5	3	1	0	1	1	1	1	0	0	1	0	1	0	1	1	0	1	1	0	0	0
180	49	2	1	51	2	5	3	5	8	1	5	5	3	8	5	6	7	4	5	10	8	9	7	2	9	8	3	4	1	0	0	0	1	0	0	0	0	1	0	1	0	0	0	0	0	1	0	0	0
181	26	1	6	197	1	18	5	7	4	1	2	4	8	9	5	3	7	6	3	5	1	2	7	4	8	1	3	7	4	1	1	1	1	1	1	1	1	1	1	1	1	0	0	1	1	1	0	1	0
182	40	1	6	169	1	21	5	7	4	1	2	4	8	9	5	3	7	6	9	7	1	2	7	4	8	6	3	9	4	1	1	1	1	1	1	1	1	1	1	1	1	1	0	1	1	1	0	1	1
183	58	1	6	71	1	14	5	7	4	1	2	4	8	8	5	6	7	7	7	3	4	8	7	4	5	6	3	6	4	1	1	1	1	1	1	1	0	1	0	1	0	0	1	0	0	1	0	0	1
184	29	1	6	45	1	9	5	7	8	2	2	4	3	6	2	3	7	9	7	3	9	8	7	7	9	6	9	5	1	1	1	0	0	1	1	0	0	0	1	1	0	0	1	0	0	1	0	0	1
185	28	2	4	197	1	22	5	7	4	1	2	4	8	9	5	3	7	6	9	3	1	2	7	9	8	6	3	5	4	1	1	1	1	1	1	1	1	1	1	1	1	1	1	1	1	1	1	1	1
186	25	2	4	197	1	15	5	7	3	1	2	4	8	5	5	4	7	6	9	3	9	2	7	7	9	3	3	5	4	1	1	0	1	1	1	1	0	1	0	1	1	1	1	0	1	1	0	0	0
187	26	2	1	51	2	17	5	6	4	10	2	4	8	10	5	3	7	6	3	3	1	2	7	9	8	9	3	5	4	1	0	1	0	1	1	1	0	1	1	1	1	0	1	1	1	1	1	1	0
188	25	2	6	15	1	1	8	5	5	5	8	6	5	5	1	6	6	7	7	7	7	6	6	7	4	6	6	5	6	0	0	0	0	0	0	0	0	0	0	0	0	0	0	0	0	0	0	0	1
189	24	2	1	51	2	11	5	7	3	1	2	4	8	5	5	6	7	8	3	3	5	3	7	7	5	8	3	8	6	1	1	0	1	1	1	1	0	1	0	1	0	0	1	0	0	1	0	0	0
190	27	1	1	90	1	3	6	5	7	8	4	6	3	6	5	6	7	5	2	3	8	10	6	7	7	3	8	5	6	0	0	0	0	0	0	0	0	1	0	1	0	0	1	0	0	0	0	0	0
191	58	2	6	51	2	11	5	8	3	10	2	2	3	2	5	3	3	1	3	3	1	3	7	7	8	6	3	5	4	1	0	0	0	1	0	0	0	1	1	0	0	0	1	1	0	1	0	1	1
192	47	2	6	92	1	11	5	5	2	1	2	2	8	7	5	3	7	8	7	1	1	2	7	7	4	3	5	1	4	1	0	0	1	1	0	1	0	1	1	1	0	0	0	1	1	1	0	0	0
193	32	1	4	156	1	11	5	6	4	8	2	9	8	2	5	3	4	8	3	7	8	2	7	7	8	6	3	5	9	1	0	1	0	1	0	1	0	1	1	0	0	0	0	0	1	1	0	1	1
194	51	1	1	51	2	4	10	10	10	10	2	9	3	10	3	1	6	4	7	3	5	7	10	7	6	4	3	1	4	0	0	0	0	1	0	0	0	0	0	0	0	0	1	0	0	0	0	0	0
195	22	1	3	203	1	1	6	5	6	5	4	3	5	4	6	4	6	2	3	6	6	7	6	5	6	5	5	10	4	0	0	0	0	0	0	0	0	0	0	0	0	0	0	0	0	0	0	0	0
196	19	2	1	172	1	15	5	7	7	5	2	9	9	8	5	3	7	6	9	3	9	2	7	9	8	6	5	5	4	1	1	0	0	1	0	0	0	1	1	1	1	1	1	0	1	1	1	1	1
197	17	1	1	2	1	1	6	5	5	5	5	5	6	5	5	6	4	5	5	5	6	5	5	4	4	5	5	5	5	0	0	0	0	0	0	0	0	1	0	0	0	0	0	0	0	0	0	0	0
198	59	1	6	134	1	13	5	6	3	2	2	4	8	2	5	3	7	1	3	7	1	2	7	9	5	5	3	9	3	1	0	0	0	1	1	1	0	1	1	1	0	0	0	1	1	1	1	0	0
199	42	2	1	7	3	14	1	6	6	1	2	4	3	1	9	3	4	6	9	3	1	2	7	7	8	4	3	9	4	0	0	0	1	1	1	0	0	0	1	0	1	1	1	1	1	1	0	1	0
200	36	1	2	25	1	16	5	7	9	9	2	9	8	9	5	9	7	1	9	3	1	2	7	7	8	6	3	7	4	1	1	0	0	1	0	1	1	1	0	1	0	1	1	1	1	1	0	1	1
201	29	2	4	203	1	19	5	7	4	1	2	4	8	2	5	8	7	6	9	3	8	2	7	9	8	6	3	5	4	1	1	1	1	1	1	1	0	1	0	1	1	1	1	0	1	1	1	1	1
202	28	1	3	51	2	23	5	7	4	1	2	4	8	9	5	3	7	6	9	3	1	2	7	9	8	6	3	9	4	1	1	1	1	1	1	1	1	1	1	1	1	1	1	1	1	1	1	1	1
203	28	1	2	82	1	13	5	7	4	9	2	4	3	4	9	3	7	9	3	3	4	4	7	7	8	6	3	7	4	1	1	1	0	1	1	0	0	0	1	1	0	0	1	0	0	1	0	1	1
204	20	1	5	11	1	2	6	6	6	6	6	6	6	6	6	6	6	6	6	6	6	6	6	6	6	6	6	6	6	0	0	0	0	0	0	0	0	0	0	0	1	0	0	0	0	0	0	0	1
205	53	2	1	51	2	18	5	7	2	4	2	4	8	9	5	3	7	9	9	3	9	2	7	9	8	1	3	9	4	1	1	0	0	1	1	1	1	1	1	1	0	1	1	0	1	1	1	1	0
206	25	1	1	51	2	19	5	7	4	1	2	9	8	2	5	3	4	1	9	3	1	2	7	9	8	6	3	9	4	1	1	1	1	1	0	1	0	1	1	0	0	1	1	1	1	1	1	1	1
207	23	1	1	51	1	0	6	2	5	6	3	6	5	6	6	6	8	1	5	6	6	6	5	5	4	7	6	5	6	0	0	0	0	0	0	0	0	0	0	0	0	0	0	0	0	0	0	0	0
208	19	2	1	51	2	9	5	7	10	5	2	3	8	10	5	6	10	10	10	10	1	10	7	3	5	6	3	1	10	1	1	0	0	1	0	1	0	1	0	0	0	0	0	1	0	1	0	0	1
209	22	2	4	191	2	11	6	7	6	7	6	4	8	6	5	3	7	8	9	3	7	2	7	7	8	5	4	7	8	0	1	0	0	0	1	1	0	1	1	1	0	1	1	0	1	1	0	1	0
210	22	2	3	191	1	4	3	7	3	5	5	6	5	6	8	6	6	5	5	5	6	5	7	7	8	6	6	7	7	0	1	0	0	0	0	0	0	0	0	0	0	0	0	0	0	1	0	1	1
211	28	1	5	25	1	14	5	7	4	9	2	4	8	4	5	6	3	6	9	5	9	9	7	4	4	6	3	9	4	1	1	1	0	1	1	1	0	1	0	0	1	1	0	0	0	1	0	0	1
212	31	1	4	65	1	16	5	7	6	1	2	2	8	9	5	3	7	6	9	3	9	9	7	3	8	6	3	5	9	1	1	0	1	1	0	1	1	1	1	1	1	1	1	0	0	1	0	1	1
213	35	1	3	10	1	20	5	7	6	1	2	4	8	9	5	3	7	6	9	3	5	2	7	9	8	1	3	9	4	1	1	0	1	1	1	1	1	1	1	1	1	1	1	0	1	1	1	1	0
214	22	1	1	84	1	16	5	7	4	1	8	4	3	4	5	3	3	2	9	3	1	2	7	3	8	6	3	5	4	1	1	1	1	0	1	0	0	1	1	0	0	1	1	1	1	1	0	1	1
215	19	1	1	9	1	2	6	5	7	6	2	6	5	7	5	5	6	5	6	5	6	5	6	5	4	5	7	6	5	0	0	0	0	1	0	0	0	1	0	0	0	0	0	0	0	0	0	0	0
216	36	1	1	84	1	2	4	4	7	3	2	1	7	6	2	6	5	3	1	2	7	7	7	6	6	4	5	4	3	0	0	0	0	1	0	0	0	0	0	0	0	0	0	0	0	1	0	0	0
217	29	2	6	84	1	6	5	6	5	5	2	6	4	9	5	5	3	10	3	5	6	9	7	4	5	4	3	1	10	1	0	0	0	1	0	0	1	1	0	0	0	0	0	0	0	1	0	0	0
218	22	1	6	84	1	6	3	5	5	1	2	8	10	10	5	5	4	4	9	3	8	1	7	3	10	1	10	10	10	0	0	0	1	1	0	0	0	1	0	0	0	1	1	0	0	1	0	0	0
219	26	1	1	84	1	7	5	3	7	2	2	5	6	5	5	9	7	5	3	7	10	7	7	9	5	1	3	5	6	1	0	0	0	1	0	0	0	1	0	1	0	0	0	0	0	1	1	0	0
220	28	1	1	84	1	7	5	8	8	7	2	8	6	4	5	3	4	2	3	9	3	3	9	7	7	6	3	5	4	1	0	0	0	1	0	0	0	1	1	0	0	0	0	0	0	0	0	0	1
221	27	2	2	84	1	9	4	3	8	1	2	8	3	3	5	3	8	6	9	3	7	7	7	9	5	8	5	5	10	0	0	0	1	1	0	0	0	1	1	0	1	1	1	0	0	1	1	0	0
222	22	1	1	84	1	14	9	7	3	1	2	2	8	9	3	6	7	6	9	3	9	9	7	7	8	1	3	9	4	0	1	0	1	1	0	1	1	0	0	1	1	1	1	0	0	1	0	1	0
223	23	2	6	84	1	17	5	7	2	9	2	4	8	9	5	4	4	4	9	3	1	2	7	9	8	6	3	4	4	1	1	0	0	1	1	1	1	1	0	0	0	1	1	1	1	1	1	1	1
224	23	2	1	84	1	13	5	7	3	9	2	9	8	2	5	4	3	3	3	3	2	2	7	9	9	6	3	9	4	1	1	0	0	1	0	1	0	1	0	0	0	0	1	0	1	1	1	0	1
225	33	1	1	84	1	13	5	7	4	1	2	6	6	2	5	7	7	7	3	7	1	8	7	4	8	6	3	1	4	1	1	1	1	1	0	0	0	1	0	1	0	0	0	1	0	1	0	1	1
226	38	1	1	84	1	9	5	7	7	9	2	4	6	8	5	3	9	5	3	7	7	4	7	7	8	9	3	5	7	1	1	0	0	1	1	0	0	1	1	0	0	0	0	0	0	1	0	1	0
227	27	2	6	84	1	12	5	3	4	9	2	3	8	9	5	8	7	9	9	7	2	2	7	6	8	9	3	10	9	1	0	1	0	1	0	1	1	1	0	1	0	1	0	0	1	1	0	1	0
228	29	1	6	84	1	4	5	6	10	10	2	8	6	10	3	1	10	10	5	2	8	10	7	4	10	1	4	9	1	1	0	0	0	1	0	0	0	0	0	0	0	0	0	0	0	1	0	0	0
229	22	1	1	84	1	7	5	6	2	1	2	4	8	8	5	7	3	2	5	8	5	7	7	7	4	8	4	8	1	1	0	0	1	1	1	1	0	1	0	0	0	0	0	0	0	1	0	0	0
230	36	2	1	84	1	6	3	8	3	8	2	1	4	5	5	7	7	8	8	3	8	3	7	7	5	1	3	4	3	0	0	0	0	1	0	0	0	1	0	1	0	0	1	0	0	1	0	0	0
231	24	2	6	84	1	7	5	8	3	1	1	4	8	6	3	7	1	6	3	7	3	6	7	1	8	3	5	5	6	1	0	0	1	0	1	1	0	0	0	0	1	0	0	0	0	1	0	1	0
232	22	2	3	84	1	8	5	6	4	1	2	3	8	4	7	4	4	8	9	5	4	8	7	5	5	5	4	6	4	1	0	1	1	1	0	1	0	0	0	0	0	1	0	0	0	1	0	0	0
233	27	1	6	84	1	3	5	4	6	7	2	6	6	1	7	8	8	8	5	8	4	2	3	3	5	7	5	1	2	1	0	0	0	1	0	0	0	0	0	0	0	0	0	0	1	0	0	0	0
234	24	2	1	84	1	12	5	6	6	5	2	4	8	5	3	3	7	6	5	3	10	1	7	7	8	6	3	4	1	1	0	0	0	1	1	1	0	0	1	1	1	0	1	0	0	1	0	1	1
235	24	2	1	84	1	5	7	6	3	2	2	2	6	5	5	3	7	9	3	7	4	9	7	1	7	2	8	7	3	0	0	0	0	1	0	0	0	1	1	1	0	0	0	0	0	1	0	0	0
236	25	2	1	84	1	22	5	7	4	1	2	4	8	9	5	3	7	6	9	3	1	2	7	9	8	6	3	5	4	1	1	1	1	1	1	1	1	1	1	1	1	1	1	1	1	1	1	1	1
237	32	2	1	84	1	4	2	5	6	8	6	5	8	7	7	7	6	7	8	7	5	2	7	5	6	6	7	4	3	0	0	0	0	0	0	1	0	0	0	0	0	0	0	0	1	1	0	0	1
238	33	2	6	84	1	5	2	8	8	1	1	2	6	9	5	5	5	8	3	4	9	1	7	5	4	5	3	5	3	0	0	0	1	0	0	0	1	1	0	0	0	0	0	0	0	1	0	0	0
239	23	1	6	84	1	14	5	7	6	9	1	7	9	8	5	3	7	6	9	3	4	2	7	7	8	6	3	5	4	1	1	0	0	0	0	0	0	1	1	1	1	1	1	0	1	1	0	1	1
240	24	2	1	84	1	19	5	7	4	1	2	6	8	5	5	3	7	6	3	3	1	2	7	9	8	6	3	5	4	1	1	1	1	1	0	1	0	1	1	1	1	0	1	1	1	1	1	1	1
241	21	1	1	84	1	7	5	6	4	1	2	2	3	3	5	3	5	3	5	6	9	7	8	4	9	6	4	5	8	1	0	1	1	1	0	0	0	1	1	0	0	0	0	0	0	0	0	0	1
242	27	1	1	84	1	17	5	7	4	1	2	4	8	9	5	3	7	6	3	5	5	2	7	7	8	9	3	5	4	1	1	1	1	1	1	1	1	1	1	1	1	0	0	0	1	1	0	1	0
243	23	1	1	84	1	22	5	7	4	1	2	4	8	9	5	3	7	6	9	3	1	2	7	7	8	6	3	9	4	1	1	1	1	1	1	1	1	1	1	1	1	1	1	1	1	1	0	1	1
244	28	1	1	84	1	16	5	7	4	1	2	4	8	8	5	3	6	7	9	3	1	2	7	9	8	8	6	5	6	1	1	1	1	1	1	1	0	1	1	0	0	1	1	1	1	1	1	1	0
245	40	2	1	84	1	10	5	6	6	5	2	9	8	5	5	3	7	1	1	7	8	2	7	5	8	1	3	7	1	1	0	0	0	1	0	1	0	1	1	1	0	0	0	0	1	1	0	1	0
246	26	2	1	84	1	6	5	9	9	10	7	4	9	9	7	2	7	9	5	7	5	10	7	1	9	1	3	8	9	1	0	0	0	0	1	0	1	0	0	1	0	0	0	0	0	1	0	0	0
247	44	1	1	84	1	8	3	9	9	2	2	4	8	4	7	3	3	6	1	4	4	4	7	7	8	8	3	5	3	0	0	0	0	1	1	1	0	0	1	0	1	0	0	0	0	1	0	1	0
248	42	1	6	84	1	9	5	7	3	1	1	7	8	1	5	9	7	7	1	3	1	7	7	7	5	1	5	5	5	1	1	0	1	0	0	1	0	1	0	1	0	0	1	1	0	1	0	0	0
249	26	2	5	84	1	7	4	5	5	6	2	4	3	9	5	6	4	1	7	7	1	8	7	4	9	9	5	4	4	0	0	0	0	1	1	0	1	1	0	0	0	0	0	1	0	1	0	0	0
250	38	2	1	84	1	11	1	3	3	1	2	3	3	8	5	3	7	6	9	4	1	9	7	7	9	9	9	9	4	0	0	0	1	1	0	0	0	1	1	1	1	1	0	1	0	1	0	0	0
251	29	2	6	84	1	5	1	4	1	2	6	3	3	4	7	4	4	1	9	7	3	9	7	4	5	8	3	9	4	0	0	0	0	0	0	0	0	0	0	0	0	1	0	0	0	1	0	0	0
252	21	1	1	38	1	15	5	7	6	1	2	2	8	1	5	3	4	10	9	3	1	8	7	6	8	6	3	1	4	1	1	0	1	1	0	1	0	1	1	0	0	1	1	1	0	1	0	1	1
253	28	1	6	25	1	19	1	7	4	1	2	4	8	9	5	3	7	6	5	3	1	2	7	7	8	6	3	9	9	0	1	1	1	1	1	1	1	1	1	1	1	0	1	1	1	1	0	1	1
254	49	1	3	33	1	15	5	7	2	1	2	4	8	9	5	9	7	6	3	3	5	9	7	4	8	9	3	5	4	1	1	0	1	1	1	1	1	1	0	1	1	0	1	0	0	1	0	1	0
255	15	1	1	123	3	4	1	6	5	4	2	7	8	6	1	3	4	5	1	6	3	7	7	7	5	8	6	10	7	0	0	0	0	1	0	1	0	0	1	0	0	0	0	0	0	1	0	0	0
256	19	2	1	51	2	2	1	8	7	3	8	1	7	8	3	7	2	6	7	2	6	8	7	8	2	4	4	8	2	0	0	0	0	0	0	0	0	0	0	0	1	0	0	0	0	1	0	0	0
257	24	2	6	82	2	1	6	5	7	3	3	5	7	10	3	7	6	9	7	9	3	2	2	7	6	8	4	3	7	0	0	0	0	0	0	0	0	0	0	0	0	0	0	0	1	0	0	0	0
258	46	1	2	3	1	12	5	7	4	1	2	2	8	2	5	3	7	6	1	3	1	7	8	7	2	4	4	7	8	1	1	1	1	1	0	1	0	1	1	1	1	0	1	1	0	0	0	0	0
259	19	2	1	51	2	19	5	6	4	1	2	4	8	9	5	3	7	6	3	3	1	2	7	7	8	6	3	4	4	1	0	1	1	1	1	1	1	1	1	1	1	0	1	1	1	1	0	1	1
260	18	1	1	11	1	2	10	10	10	10	10	10	10	10	5	3	10	10	10	10	10	10	10	10	10	10	10	10	10	0	0	0	0	0	0	0	0	1	1	0	0	0	0	0	0	0	0	0	0
261	19	2	1	51	2	12	5	6	7	2	2	4	8	10	5	6	10	7	9	3	1	7	7	4	8	4	3	9	3	1	0	0	0	1	1	1	0	1	0	0	0	1	1	1	0	1	0	1	0
262	19	2	1	51	2	17	5	6	4	9	2	8	8	9	5	3	7	7	9	3	5	9	7	9	8	6	3	9	4	1	0	1	0	1	0	1	1	1	1	1	0	1	1	0	0	1	1	1	1
263	18	2	1	51	2	8	5	6	9	9	2	4	10	3	5	8	4	6	3	4	8	6	7	7	7	4	3	4	4	1	0	0	0	1	1	0	0	1	0	0	1	0	0	0	0	1	0	0	0
264	25	2	1	51	2	21	5	7	4	1	2	4	8	9	5	3	7	6	9	3	1	2	7	7	8	6	3	4	4	1	1	1	1	1	1	1	1	1	1	1	1	1	1	1	1	1	0	1	1
265	30	1	3	109	1	14	5	2	2	1	2	4	8	7	5	3	3	5	3	3	1	2	7	1	8	4	3	5	4	1	0	0	1	1	1	1	0	1	1	0	0	0	1	1	1	1	0	1	0
266	19	2	1	51	2	6	5	7	4	4	2	3	3	7	5	1	6	8	6	2	6	3	7	6	5	9	4	5	6	1	1	1	0	1	0	0	0	1	0	0	0	0	0	0	0	1	0	0	0
267	22	2	1	84	1	12	5	7	4	10	2	4	6	10	5	6	3	5	3	3	8	2	7	9	8	6	10	5	10	1	1	1	0	1	1	0	0	1	0	0	0	0	1	0	1	1	1	1	1
268	33	2	5	84	1	7	6	6	6	6	2	4	3	2	7	7	7	5	3	7	4	8	7	4	4	6	3	6	4	0	0	0	0	1	1	0	0	0	0	1	0	0	0	0	0	1	0	0	1
269	23	1	1	84	1	7	8	6	4	8	2	8	3	2	5	9	9	1	3	3	1	10	7	7	4	4	3	6	6	0	0	1	0	1	0	0	0	1	0	0	0	0	1	1	0	1	0	0	0
270	27	2	6	84	1	6	6	6	6	1	2	7	8	7	5	6	3	6	1	8	3	8	5	7	5	4	5	4	4	0	0	0	1	1	0	1	0	1	0	0	1	0	0	0	0	0	0	0	0
271	28	1	3	84	1	11	1	6	5	1	2	8	8	3	5	5	7	7	9	3	8	1	7	1	8	1	3	1	4	0	0	0	1	1	0	1	0	1	0	1	0	1	1	0	0	1	0	1	0
272	25	1	4	84	1	10	3	2	2	5	2	6	6	5	5	4	7	6	9	3	1	8	7	3	8	1	3	5	3	0	0	0	0	1	0	0	0	1	0	1	1	1	1	1	0	1	0	1	0
273	23	2	5	84	1	9	5	8	6	9	2	4	9	4	5	9	4	2	3	3	3	2	7	1	8	9	5	5	4	1	0	0	0	1	1	0	0	1	0	0	0	0	1	0	1	1	0	1	0
274	23	1	3	84	1	6	3	7	6	1	2	4	3	8	3	7	3	10	3	5	5	5	7	8	8	4	6	3	6	0	1	0	1	1	1	0	0	0	0	0	0	0	0	0	0	1	0	1	0
275	23	2	6	84	1	4	5	8	6	2	5	6	3	8	7	6	10	7	7	3	8	6	7	4	8	4	7	6	10	1	0	0	0	0	0	0	0	0	0	0	0	0	1	0	0	1	0	1	0
276	23	1	1	84	1	5	1	7	8	6	7	7	7	6	3	3	7	6	3	7	1	5	3	7	4	4	5	7	8	0	1	0	0	0	0	0	0	0	1	1	1	0	0	1	0	0	0	0	0
277	37	1	5	84	1	5	1	4	3	2	2	3	4	6	5	4	7	6	7	5	4	8	7	5	5	5	4	5	9	0	0	0	0	1	0	0	0	1	0	1	1	0	0	0	0	1	0	0	0
278	24	1	3	84	1	7	5	10	10	10	5	6	8	2	5	10	7	9	9	6	10	10	7	3	1	4	3	10	10	1	0	0	0	0	0	1	0	1	0	1	0	1	0	0	0	1	0	0	0
279	25	1	6	84	1	21	1	7	4	1	2	4	8	9	5	3	7	6	9	3	8	2	7	9	8	6	3	9	4	0	1	1	1	1	1	1	1	1	1	1	1	1	1	0	1	1	1	1	1
280	24	1	1	84	1	14	5	7	6	1	2	4	8	10	4	3	7	6	3	3	1	2	7	7	9	10	7	7	4	1	1	0	1	1	1	1	0	0	1	1	1	0	1	1	1	1	0	0	0
281	24	1	4	84	1	15	5	2	7	2	2	10	8	2	5	3	7	6	9	3	1	2	7	9	7	6	9	1	4	1	0	0	0	1	0	1	0	1	1	1	1	1	1	1	1	1	1	0	1
282	22	1	5	84	1	20	5	7	4	9	2	4	8	8	5	3	7	6	9	3	1	2	7	9	8	6	3	5	4	1	1	1	0	1	1	1	0	1	1	1	1	1	1	1	1	1	1	1	1
283	22	2	6	84	1	7	1	7	7	2	2	10	8	5	7	5	10	1	9	7	2	7	7	7	5	6	3	10	1	0	1	0	0	1	0	1	0	0	0	0	0	1	0	0	0	1	0	0	1
284	23	1	6	84	1	15	5	7	8	9	2	4	10	2	5	3	7	6	3	10	5	2	7	9	8	6	3	5	4	1	1	0	0	1	1	0	0	1	1	1	1	0	0	0	1	1	1	1	1
285	23	1	6	84	1	19	5	7	4	2	2	9	8	9	5	3	7	6	9	7	1	2	7	9	8	6	3	9	9	1	1	1	0	1	0	1	1	1	1	1	1	1	0	1	1	1	1	1	1
286	23	1	3	84	1	14	5	7	2	1	2	4	3	9	5	6	3	9	1	3	9	9	7	9	8	6	10	9	4	1	1	0	1	1	1	0	1	1	0	0	0	0	1	0	0	1	1	1	1
287	21	2	6	84	1	19	5	7	4	1	2	4	8	9	5	3	7	6	9	7	1	2	2	9	9	6	3	7	4	1	1	1	1	1	1	1	1	1	1	1	1	1	0	1	1	0	1	0	1
288	26	1	6	84	1	14	1	7	4	1	2	4	8	1	5	3	4	6	7	6	1	2	7	4	8	8	5	8	4	0	1	1	1	1	1	1	0	1	1	0	1	0	0	1	1	1	0	1	0
289	18	2	1	51	2	16	5	7	9	1	2	4	8	8	5	3	9	6	9	5	8	2	7	4	8	9	3	9	4	1	1	0	1	1	1	1	0	1	1	0	1	1	0	0	1	1	0	1	0
290	25	1	3	84	1	17	5	7	4	1	2	8	8	8	5	3	7	1	9	3	1	2	7	4	7	6	3	5	4	1	1	1	1	1	0	1	0	1	1	1	0	1	1	1	1	1	0	0	1
291	25	1	1	84	1	6	5	7	5	5	2	3	2	1	5	7	7	4	7	4	4	5	7	6	5	5	4	4	3	1	1	0	0	1	0	0	0	1	0	1	0	0	0	0	0	1	0	0	0
292	23	1	1	84	1	7	3	2	6	5	2	2	8	2	5	3	5	10	1	7	1	7	5	3	8	8	3	5	1	0	0	0	0	1	0	1	0	1	1	0	0	0	0	1	0	0	0	1	0
293	21	2	6	84	1	5	3	6	2	9	5	4	6	5	5	9	7	9	1	3	8	9	9	2	9	6	9	3	7	0	0	0	0	0	1	0	0	1	0	1	0	0	1	0	0	0	0	0	1
294	23	2	6	84	1	6	3	6	8	1	2	3	6	5	5	8	4	6	7	7	8	8	7	2	7	5	5	3	4	0	0	0	1	1	0	0	0	1	0	0	1	0	0	0	0	1	0	0	0
295	20	2	6	51	2	6	6	10	4	10	7	4	3	10	5	6	10	1	7	3	5	10	7	4	8	4	5	10	9	0	0	1	0	0	1	0	0	1	0	0	0	0	1	0	0	1	0	1	0
296	24	2	6	157	2	4	6	6	4	5	2	10	3	4	3	6	6	9	3	3	9	8	7	4	5	1	10	10	6	0	0	1	0	1	0	0	0	0	0	0	0	0	1	0	0	1	0	0	0
297	23	1	3	84	1	21	5	7	4	1	2	4	8	8	5	3	7	6	9	3	1	2	7	9	8	9	3	9	4	1	1	1	1	1	1	1	0	1	1	1	1	1	1	1	1	1	1	1	0
298	24	2	6	84	1	9	3	7	4	1	2	6	6	7	5	5	4	6	5	4	3	6	7	7	5	6	3	8	6	0	1	1	1	1	0	0	0	1	0	0	1	0	0	0	0	1	0	0	1
299	36	2	1	84	1	14	5	7	6	1	2	4	3	1	3	7	7	5	9	3	8	2	7	7	8	6	3	5	4	1	1	0	1	1	1	0	0	0	0	1	0	1	1	0	1	1	0	1	1
300	17	2	4	51	2	20	5	7	4	1	2	4	8	4	5	3	7	6	9	3	1	2	7	9	8	4	3	8	4	1	1	1	1	1	1	1	0	1	1	1	1	1	1	1	1	1	1	1	0
301	23	1	1	84	1	11	5	7	8	1	2	7	8	8	5	4	7	7	3	7	5	2	7	7	7	6	3	5	8	1	1	0	1	1	0	1	0	1	0	1	0	0	0	0	1	1	0	0	1
302	20	2	5	51	2	21	5	7	4	1	2	4	8	9	5	3	7	6	9	3	1	9	7	9	8	6	3	5	4	1	1	1	1	1	1	1	1	1	1	1	1	1	1	1	0	1	1	1	1
303	18	2	1	51	2	14	5	7	3	8	2	4	8	5	5	3	7	6	3	3	3	1	7	4	8	1	3	5	4	1	1	0	0	1	1	1	0	1	1	1	1	0	1	0	0	1	0	1	0
304	23	1	5	84	1	4	8	3	7	4	2	6	2	8	3	6	7	5	4	7	1	5	6	5	8	2	4	6	7	0	0	0	0	1	0	0	0	0	0	1	0	0	0	1	0	0	0	1	0
305	23	1	6	84	1	5	10	5	5	5	2	2	8	9	7	7	6	10	2	7	5	6	7	7	8	4	5	7	6	0	0	0	0	1	0	1	1	0	0	0	0	0	0	0	0	1	0	1	0
306	19	2	1	51	2	5	5	3	7	5	1	4	3	1	7	4	9	2	9	10	3	9	7	7	8	7	4	5	2	1	0	0	0	0	1	0	0	0	0	0	0	1	0	0	0	1	0	1	0
307	18	2	1	51	2	17	5	7	4	1	2	4	8	9	5	3	7	5	9	3	9	10	7	7	8	6	3	5	3	1	1	1	1	1	1	1	1	1	1	1	0	1	1	0	0	1	0	1	1
308	24	1	4	51	2	10	5	4	4	10	2	4	8	9	7	4	10	10	1	3	9	9	7	9	7	10	3	10	1	1	0	1	0	1	1	1	1	0	0	0	0	0	1	0	0	1	1	0	0
309	18	2	3	51	2	3	5	10	10	10	9	10	4	5	5	6	10	9	5	7	2	10	7	4	5	10	5	1	10	1	0	0	0	0	0	0	0	1	0	0	0	0	0	0	0	1	0	0	0
310	31	1	6	51	2	17	5	7	6	1	2	4	8	8	5	3	7	9	9	3	1	8	7	7	8	6	3	5	4	1	1	0	1	1	1	1	0	1	1	1	0	1	1	1	0	1	0	1	1
311	23	1	1	84	1	11	5	7	3	2	2	8	8	8	5	4	7	7	3	3	5	2	7	4	8	8	3	5	6	1	1	0	0	1	0	1	0	1	0	1	0	0	1	0	1	1	0	1	0
312	20	2	1	51	2	10	1	6	7	2	2	4	3	8	5	3	7	6	3	5	1	7	7	7	8	4	4	1	4	0	0	0	0	1	1	0	0	1	1	1	1	0	0	1	0	1	0	1	0
313	18	2	3	51	2	4	1	3	7	8	2	7	8	10	9	4	8	10	10	5	10	6	7	7	9	9	3	10	9	0	0	0	0	1	0	1	0	0	0	0	0	0	0	0	0	1	0	0	0
314	24	2	1	39	3	2	9	3	7	6	4	9	2	7	10	3	7	3	7	8	4	7	6	3	6	4	6	4	5	0	0	0	0	0	0	0	0	0	1	1	0	0	0	0	0	0	0	0	0
315	38	2	4	51	2	10	6	7	3	1	2	8	8	3	5	6	3	7	5	3	1	4	7	3	5	4	3	5	4	0	1	0	1	1	0	1	0	1	0	0	0	0	1	1	0	1	0	0	0
316	19	2	1	51	2	12	1	6	4	1	2	4	6	5	5	3	9	6	9	5	9	2	7	7	4	10	3	1	4	0	0	1	1	1	1	0	0	1	1	0	1	1	0	0	1	1	0	0	0
317	19	2	1	51	2	13	5	7	4	2	2	4	8	9	5	3	3	1	3	6	9	2	7	7	8	1	3	5	6	1	1	1	0	1	1	1	1	1	1	0	0	0	0	0	1	1	0	1	0
[truncated: 28 more columns]

## Sheet: Age
Age:	Participants' reported chronological age in years.

## Sheet: Gender
Gender:	Participants' reported gender.
Values:
1	Male
2	Female

## Sheet: Secondary
Secondary:	Participants' reported orientation of their secondary education.
Values:
1	General
2	Economy or related
3	Natural sciences
4	Social sciences
5	Art and design
6	Other orientation

## Sheet: Country
Country:	Participants' reported nationality.
Values:
1	Afghanistan
2	Albania
3	Algeria
4	Andorra
5	Angola
6	Antigua and Barbuda
7	Argentina
8	Armenia
9	Aruba
10	Australia
11	Austria
12	Azerbaijan
13	Bahamas, The
14	Bahrain
15	Bangladesh
16	Barbados
17	Belarus
18	Belgium
19	Belize
20	Benin
21	Bhutan
22	Bolivia
23	Bosnia and Herzegovina
24	Botswana
25	Brazil
26	Brunei
27	Bulgaria
28	Burkina Faso
29	Burma
30	Burundi
31	Cambodia
32	Cameroon
33	Canada
34	Cape Verde
35	Central African Republic
36	Chad
37	Chile
38	China
39	Colombia
40	Comoros
41	Congo, Democratic Republic of the
42	Congo, Republic of the
43	Costa Rica
44	Cote d'Ivoire
45	Croatia
46	Cuba
47	Curacao
48	Cyprus
49	Czech Republic
50	Denmark
51	Deutschland
52	Djibouti
53	Dominica
54	East Timor (see Timor-Leste)
55	Ecuador
56	Egypt
57	El Salvador
58	Equatorial Guinea
59	Eritrea
60	Estonia
61	Ethiopia
62	Fiji
63	Finland
64	France
65	French Guiana
66	Gabon
67	Gambia, The
68	Georgia
69	Ghana
70	Greece
71	Grenada
72	Guadeloupe
73	Guatemala
74	Guinea
75	Guinea-Bissau
76	Guyana
77	Haiti
78	Holy See
79	Honduras
80	Hong Kong
81	Hungary
82	Iceland
83	India
84	Indonesia
85	Iran
86	Iraq
87	Ireland
88	Israel
89	Italy
90	Jamaica
91	Japan
92	Jordan
93	Kazakhstan
94	Kenya
95	Kiribati
96	Korea, North
97	Korea, South
98	Kosovo
99	Kuwait
100	Kyrgyzstan
101	Laos
102	Latvia
103	Lebanon
104	Lesotho
105	Liberia
106	Libya
107	Liechtenstein
108	Lithuania
109	Luxembourg
110	Macau
111	Macedonia
112	Madagascar
113	Malawi
114	Malaysia
115	Maldives
116	Mali
117	Malta
118	Marshall Islands
119	Martinique
120	Mauritania
121	Mauritius
122	México
123	Micronesia
124	Moldova
125	Monaco
126	Mongolia
127	Montenegro
128	Morocco
129	Mozambique
130	Namibia
131	Nauru
132	Nepal
133	Netherlands
134	Netherlands Antilles
135	New Zealand
136	Nicaragua
137	Niger
138	Nigeria
139	North Korea
140	Norway
141	Oman
142	Pakistan
143	Palau
144	Palestinian Territories
145	Panama
146	Papua New Guinea
147	Paraguay
148	Perú
149	Philippines
150	Poland
151	Portugal
152	Puerto Rico
153	Qatar
154	República Dominicana
155	Romania
156	Russia
157	Rwanda
158	Saint Barthélemy
159	Saint Kitts and Nevis
160	Saint Lucia
161	Saint Martin
162	Saint Vincent and the Grenadines
163	Samoa
164	San Marino
165	Sao Tome and Principe
166	Saudi Arabia
167	Senegal
168	Serbia
169	Seychelles
170	Sierra Leone
171	Singapore
172	Sint Maarten
173	Slovakia
174	Slovenia
175	Solomon Islands
176	Somalia
177	South Africa
178	South Korea
179	South Sudan
180	Spain
181	Sri Lanka
182	Sudan
183	Suriname
184	Swaziland
185	Sweden
186	Switzerland
187	Syria
188	Taiwan
189	Tajikistan
190	Tanzania
191	Thailand
192	Timor-Leste
193	Togo
194	Tonga
195	Trinidad and Tobago
196	Tunisia
197	Turkey
198	Turkmenistan
199	Tuvalu
200	Uganda
201	Ukraine
202	United Arab Emirates
203	United Kingdom
204	United States
205	Uruguay
206	Uzbekistan
207	Vanuatu
208	Venezuela
209	Vietnam
210	Yemen
211	Zambia
212	Zimbabwe

## Sheet: Language
Language:	Participants' chosen language to perform the test.
Values:
1	English
2	German
3	Spanish

## Sheet: Total
Total:	Sum of the binary values.

## Sheet: Item
Item:	Number of response to a given item.
Values should be read from left to right and top down (see Fig. 2).

## Sheet: Binary
Binary:	Number of response to a given item converted to 0 or 1.
Values:
1	Right answer
0	Wrong answer / I don't know

## Sheet: Time
Time:	Seconds spent between item presentation and clicking "Next" after a response was given.

[truncated: 2 more sheets: TotalTime, SDTime]
